# Supplementary material for: Deciphering the trophic interaction between Akkermansia muciniphila and the butyrogenic gut commensal Anaerostipes caccae using a metatranscriptomic approach
Source: PubMed Central journal article supplement (PMC5945754; doi:10.1007/s10482-018-1040-x), 2018-02-19
Supplement: 10482_2018_1040_MOESM1_ESM.pdf [file 10482_2018_1040_MOESM1_ESM.pdf]

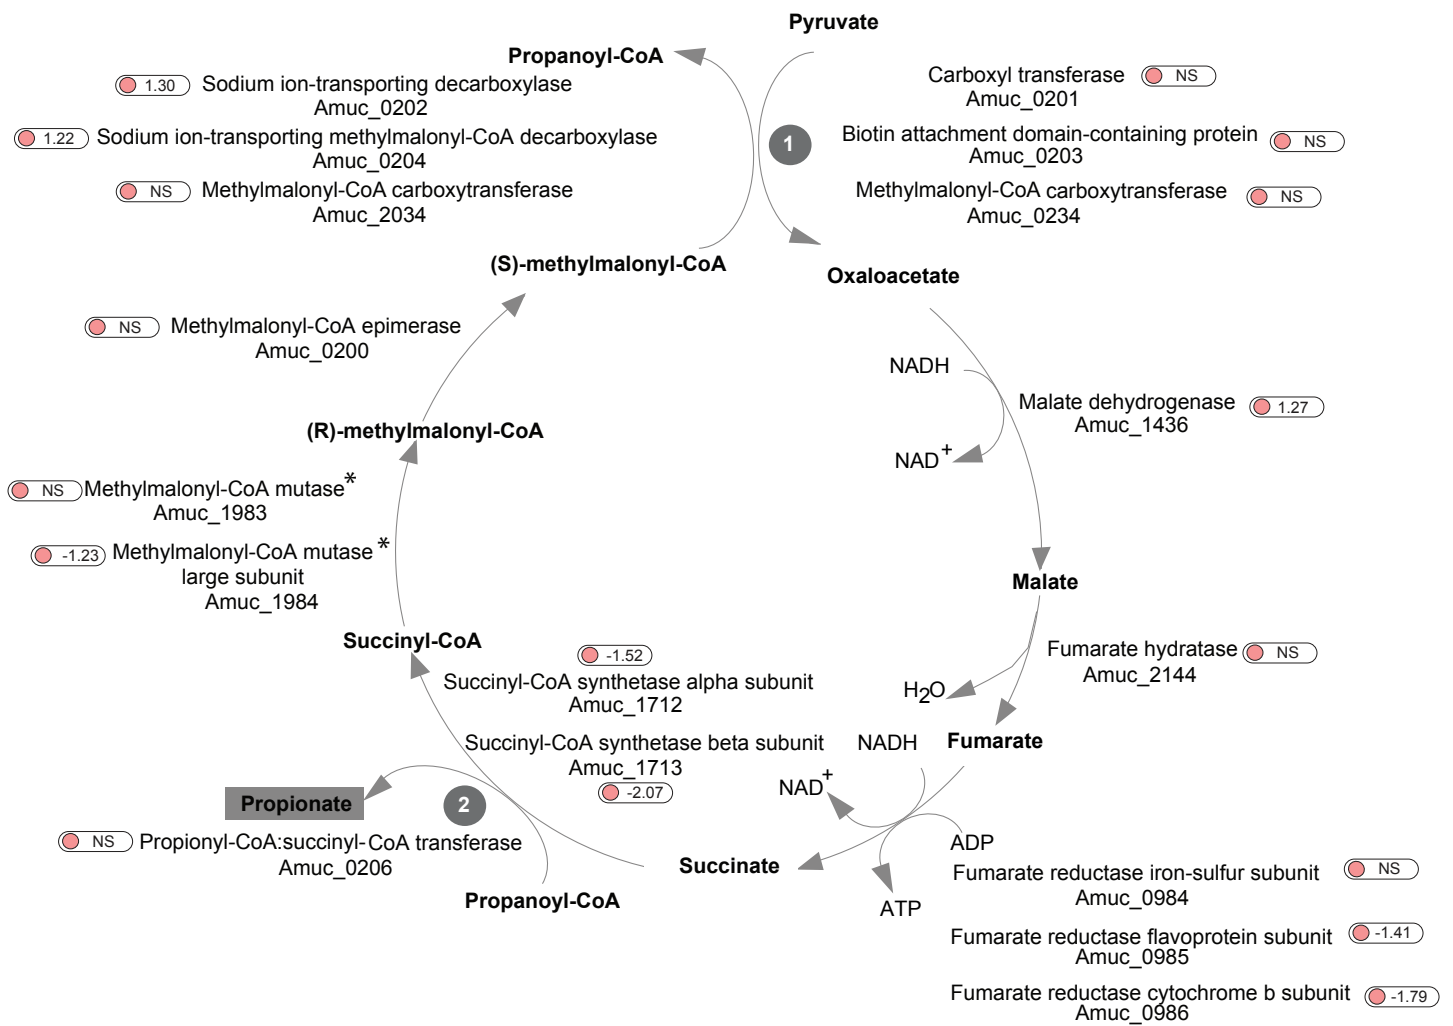

**1** Exergonic decarboxylation (methylmalonyl-CoA to propionyl-CoA)

**2** Endergonic formation of the thiol ester (succinate to succinyl-CoA) gears to the exergonic cleavage of the thiol ester (propionyl-CoA to propionate or acetyl-CoA to acetate)

● Differential expression (in fold change) of *A. muciniphila* in monoculture compared to *A.muc-A.cac* co-culture

\* Vitamin B12-dependent enzyme
